# Supplementary material
Source: PubMed Central journal article supplement (PMC10043867)
Supplement: 41575_2023_759_MOESM1_ESM.pdf [file 41575_2023_759_MOESM1_ESM.pdf]

---

# Global epidemiology of cirrhosis – aetiology, trends and predictions

---

In the format provided by the  
authors and unedited

**Supplementary Table 1** | Selected studies<sup>a</sup> that provided data for the aetiology of cirrhosis

| Study                                 | Study period | Location | Diagnosis of cirrhosis                                              | Study population                                                                                                                    | Proportion of cirrhosis cases by aetiology                                                                                                                                                                     |
|---------------------------------------|--------------|----------|---------------------------------------------------------------------|-------------------------------------------------------------------------------------------------------------------------------------|----------------------------------------------------------------------------------------------------------------------------------------------------------------------------------------------------------------|
| <b>The Americas</b>                   |              |          |                                                                     |                                                                                                                                     |                                                                                                                                                                                                                |
| Flemming et al. <sup>1</sup>          | 2000–2017    | Canada   | OHIP or ICD codes                                                   | Population-based study of 159,549 individuals with an incident diagnosis of cirrhosis in Ontario, Canada                            | NASH: 52.7%; Alcohol: 24.4%; HCV: 12.3%; HBV: 5.6%                                                                                                                                                             |
| Orman et al. <sup>2</sup>             | 2004–2014    | USA      | ICD codes                                                           | 9,261 patients with newly diagnosed cirrhosis in the Indiana Network for Patient Care                                               | Alcohol: 33.5%; viral: 39.0%; NAFLD/other: 24.9%; autoimmune/cholestatic: 2.6%<br><u>Trends</u><br>Alcohol: 0.8% increase per year<br>NAFLD: 0.6% increase per year<br>Viral hepatitis: 1.4% decrease per year |
| Ioannou et al. <sup>3</sup>           | 2001–2014    | USA      | ICD codes                                                           | 116,404 patients with cirrhosis in the Veterans Health Administration                                                               | HCV: 45%; Alcohol: 31%; NAFLD: 15%; Other aetiologies: 9%                                                                                                                                                      |
| Goldberg et al. <sup>4</sup>          | 2006–2014    | USA      | ICD codes                                                           | 24,258 patients with compensated cirrhosis and 14,971 with decompensated cirrhosis from the HealthCore Integrated Research Database | <u>Compensated cirrhosis</u><br>HCV: 23.9%; Alcohol: 23.5%; Possible NASH: 14.5%<br><u>Decompensated cirrhosis</u><br>HCV: 26.8%; Alcohol: 43.2%; Presumed NASH: 16.5%                                         |
| El-Serag et al. <sup>5</sup>          | 2016–2019    | USA      | Histology, radiographic features, elastography, or serum biomarkers | 1,717 patients from 5 institutions in Texas, USA, with compensated cirrhosis                                                        | Cured HCV: 33.1%; Alcohol: 30.6%; NAFLD: 23.3%; Active HCV: 16.1%; Active HBV: 2.5%                                                                                                                            |
| Gonzalez-Chagolla et al. <sup>6</sup> | 2000–2019    | Mexico   | Clinical, laboratory, radiographic, and endoscopic features         | 4,584 patients with cirrhosis, 77% with previous decompensations from 6 tertiary hospitals in central Mexico                        | <u>2000</u><br>HCV: 45%; Alcohol: 28%; MAFLD <sup>b</sup> : 14%<br><u>2019</u><br>HCV: 11%; Alcohol: 33%; MAFLD: 36%                                                                                           |
| Appel-da-Silva et al. <sup>7</sup>    | 2005–2014    | Brazil   | Clinical, laboratory, radiographic, and endoscopic features         | 453 patients with cirrhosis that attended a specialist referral clinic                                                              | Among patients without HCC at baseline:<br>HCV: 34.9%; Alcohol: 24.6%; HCV and alcohol: 19.6%;<br>HBV: 0.8%; HBV and alcohol: 1.3%; NAFLD: 1.8%;<br>Cryptogenic: 3.2%                                          |
| <b>Europe</b>                         |              |          |                                                                     |                                                                                                                                     |                                                                                                                                                                                                                |
| West et al. <sup>8</sup>              | 1987–2006    | UK       | ICD codes                                                           | 3,107 people with cirrhosis from the General Practice Research Database, a primary care database                                    | Alcohol: 56.1%; Cryptogenic: 20.8%; Viral hepatitis: 12.0%; Autoimmune/metabolic: 11.0%                                                                                                                        |

|                                  |           |         |                                                                                                        |                                                                                                                                                        |                                                                                                                                                                                                                     |
|----------------------------------|-----------|---------|--------------------------------------------------------------------------------------------------------|--------------------------------------------------------------------------------------------------------------------------------------------------------|---------------------------------------------------------------------------------------------------------------------------------------------------------------------------------------------------------------------|
| Ratib et al. <sup>9</sup>        | 1998–2009 | England | ICD and OPCS4 codes                                                                                    | 5,118 patients with cirrhosis from the Clinical Practice Research Datalink, a primary care database                                                    | <u>Males</u><br>Alcohol: 61.9%; Viral hepatitis: 11.3%; Autoimmune/metabolic: 6.2%; Cryptogenic: 20.7%<br><u>Females</u><br>Alcohol: 42.8%; Viral hepatitis: 11.1%; Autoimmune/metabolic: 15.0%; Cryptogenic: 31.1% |
| Gu et al. <sup>10</sup>          | 2005–2018 | Germany | ICD codes                                                                                              | All hospital admissions in Germany with a diagnosis code for cirrhosis                                                                                 | <u>2005</u><br>Alcohol: 51.0%; HCV: 7.0%; HBV: 2.5%; NAFLD: 0.80%; NASH: 0.13%<br><u>2018</u><br>Alcohol: 52.3%; HCV: 2.7%; HBV: 1.6%; NAFLD: 2.8%; NASH: 0.8%                                                      |
| Javaud et al. <sup>11</sup>      | 2014–2015 | France  | Histology, portal hypertension, ascites, or oesophageal varices                                        | 224 patients with cirrhosis who presented to the emergency department of 3 university hospitals                                                        | Alcohol: 51%; HCV: 19%; Mixed viral and alcohol: 13%; HBV: 8%                                                                                                                                                       |
| Hagstrom et al. <sup>12</sup>    | 2004–2017 | Sweden  | Identified using ICD codes and validated by histology, elastography, radiography, or clinical findings | 2,609 patients with cirrhosis who were evaluated at a tertiary hospital                                                                                | <u>2004–2008</u><br>Viral hepatitis: 43.4%; NAFLD 5.7%<br><u>2014–2017</u><br>Viral hepatitis: 31.0%; NAFLD 14.5%                                                                                                   |
| Olafsson et al. <sup>13</sup>    | 2010–2015 | Iceland | Histology, serum biomarkers, radiological or endoscopic findings                                       | A prospective, population-based study that included all newly diagnosed patients with cirrhosis ( <i>n</i> = 157) diagnosed in Iceland                 | Alcohol: 31%; NAFLD: 22%; Alcohol and HCV: 15%; HCV: 6%; Primary biliary cholangitis: 5%; Autoimmune hepatitis: 4%; Other: 12%; Unknown: 6%                                                                         |
| Popescu et al. <sup>14</sup>     | 2000–2017 | Romania | Not specified                                                                                          | 852 patients who received liver transplantation in Romania, as part of the national liver transplant program                                           | HBV: 28.2%; HCV: 16.8%; Alcohol: 8.8% (of total patients that received liver transplant)                                                                                                                            |
| Stroffolini et al. <sup>15</sup> | 2014      | Italy   | Histology, clinical, biochemical, and ultrasound findings                                              | 832 patients with cirrhosis from 16 hospitals in Italy; this study provided a comparison of trends in aetiology with a historical cohort <sup>16</sup> | <u>2001</u><br>HBV: 13.0%; HCV: 69.9%; Alcohol: 31.9%; NAFLD: 0.2%<br><u>2014</u><br>HBV: 17.6%; HCV: 58.6%; Alcohol: 16.0%; NAFLD: 7.3%                                                                            |
| <b>Eastern Mediterranean</b>     |           |         |                                                                                                        |                                                                                                                                                        |                                                                                                                                                                                                                     |
| Elzouki et al. <sup>17</sup>     | 2007–2012 | Qatar   | Not specified                                                                                          | 109 patients were admitted to the intensive care unit in a tertiary hospital                                                                           | HCV: 33.9%; HBV: 21.1%; Alcohol: 25.7%; Cryptogenic: 23.9%                                                                                                                                                          |
| Pourafkari et al. <sup>18</sup>  | 2011–2013 | Iran    | Clinical, biochemical, and histology                                                                   | 69 patients with cirrhosis admitted to a university hospital                                                                                           | HBV: 40.6%; alcohol: 21.7%; unknown: 24.6%; HCV 7.2%                                                                                                                                                                |

|                                    |           |           |                                                                  |                                                                                     |                                                                                                                                                                                                        |
|------------------------------------|-----------|-----------|------------------------------------------------------------------|-------------------------------------------------------------------------------------|--------------------------------------------------------------------------------------------------------------------------------------------------------------------------------------------------------|
| Tailakh et al. <sup>19</sup>       | 2002–2019 | Israel    | Histology, portal hypertension, ascites, or oesophageal varices  | 953 Jewish patients and 95 Bedouin patients who attended a tertiary hospital        | <u>Jewish patients</u><br>HCV: 39.2%; NAFLD: 17.2%; HBV: 8.9%; Alcohol: 14.4%; Cryptogenic: 8.8%<br><u>Bedouin patients</u><br>HCV: 14.7%; NAFLD: 21.1%; HBV: 17.9%; Alcohol: 2.1%; Cryptogenic: 20.0% |
| <b>Africa</b>                      |           |           |                                                                  |                                                                                     |                                                                                                                                                                                                        |
| Duah et al. <sup>20</sup>          | 2018–2020 | Ghana     | Histology, clinical, biochemical, and ultrasound findings        | 186 patients with cirrhosis admitted to a district hospital                         | HBV: 38.7%; Alcohol: 38.3%; HCV: 3.2%; NAFLD: 2.7%                                                                                                                                                     |
| Apica et al. <sup>21</sup>         | 2010–2011 | Uganda    | Clinical, biochemical, and ultrasound findings                   | 85 patients with decompensated cirrhosis were admitted to a referral hospital       | Alcohol: 55.3%; HBV: 27.1%; HCV: 3.5%                                                                                                                                                                  |
| <b>South-East Asia</b>             |           |           |                                                                  |                                                                                     |                                                                                                                                                                                                        |
| Mukherjee et al. <sup>22</sup>     | 2010–2013 | India     | Histology, serum biomarkers, radiological or endoscopic findings | 4,413 patients with cirrhosis from 11 hospitals across India                        | Alcohol: 34.3%; HBV: 18.1%; HCV: 17.3%; NAFLD: 1.7%                                                                                                                                                    |
| Alvi et al. <sup>23</sup>          | 2018–2019 | Pakistan  | Not specified                                                    | 192 patients with cirrhosis that underwent endoscopic band ligation                 | HCV 63.4%; HBV: 18.8%; Alcohol: 13.9%                                                                                                                                                                  |
| Niriella et al. <sup>24</sup>      | 2013–2014 | Sri Lanka | Not specified                                                    | 135 patients with cirrhosis presenting to a tertiary referral centre                | Cryptogenic: 62.6; alcohol: 29.9%; HBV: 1.9%                                                                                                                                                           |
| Nawalerspanya et al. <sup>25</sup> | 2014–2018 | Thailand  | Not specified                                                    | 128 patients who underwent endoscopic variceal surveillance at a tertiary hospital  | HBV: 32.8%; HCV: 37.5%; NAFLD: 5.5%; alcohol: 4.7%; others: 7.8%                                                                                                                                       |
| <b>Western Pacific</b>             |           |           |                                                                  |                                                                                     |                                                                                                                                                                                                        |
| Tan et al. <sup>26</sup>           | 2015–2017 | Malaysia  | Not specified                                                    | 105 patients with cirrhosis that underwent endoscopy for variceal surveillance      | HCV: 31.0%; HBV: 20.0%; cryptogenic: 23.6%; alcohol: 16.4%; NASH: 3.6%                                                                                                                                 |
| Tan et al. <sup>27</sup>           | 2016–2020 | Singapore | Histology, serum biomarkers, radiological or endoscopic findings | 251 patients with cirrhosis listed for liver transplantation at a tertiary hospital | HBV: 28.8%; NAFLD: 18.8%; HCV 10.8%; Alcohol: 9.6%; Others: 32.0%                                                                                                                                      |
| Huu et al. <sup>28</sup>           | 2014–2015 | Vietnam   | Elastography and features of portal hypertension                 | 47 patients with cirrhosis who were admitted to a university hospital               | HBV: 48.9%; HCV: 36.2%; alcohol: 10.6%                                                                                                                                                                 |
| Xiong et al. <sup>29</sup>         | 2003–2013 | China     | Clinical and imaging features, and/or histology                  | 1,582 patients with a new diagnosis of cirrhosis at a hospital                      | <u>2003-2013</u><br>HBV: 59.3%; Alcohol: 9.9%; HCV: 1.0%; primary biliary cholangitis: 4.4%; NASH: 1.9%<br><u>2012-2013</u><br>NASH: 3.2%                                                              |

|                              |           |             |                                                                  |                                                                                     |                                                                                                                                                                             |
|------------------------------|-----------|-------------|------------------------------------------------------------------|-------------------------------------------------------------------------------------|-----------------------------------------------------------------------------------------------------------------------------------------------------------------------------|
| Enomoto et al. <sup>30</sup> | 2007–2016 | Japan       | Clinical, laboratory, and imaging features, and/or histology     | 48,621 patients with cirrhosis from 79 hospitals in Japan                           | <u>2007</u><br>HCV: 58.6%; alcohol 13.7%; HBV: 13.6%; cryptogenic 5.6%; NASH 2.0%<br><u>2014-2016</u><br>HCV: 40.2%; alcohol 24.9%; HBV: 9.0%; cryptogenic 7.5%; NASH: 9.1% |
| Tan et al. <sup>27</sup>     | 2016–2020 | Hong Kong   | Histology, serum biomarkers, radiological or endoscopic findings | 320 patients with cirrhosis listed for liver transplantation at a tertiary hospital | HBV: 53.1%; NAFLD: 1.6%; HCV 7.5%; Alcohol: 7.2%; Others: 30.6%                                                                                                             |
| Jang et al. <sup>31</sup>    | 2000–2014 | South Korea | KCD-6 codes                                                      | 15,716 patients with cirrhosis diagnosed at 5 university hospitals                  | <u>2000-2004</u><br>HBV: 55.3%; HCV 6.3%; Alcohol 30.6%; NAFLD 1.8%<br><u>2010-2014</u><br>HBV: 41.2%; HCV: 8.5%; Alcohol 35.6%; NAFLD: 6.4%                                |

<sup>a</sup>Studies were selected to present data from diverse geographical locations; when multiple studies from the same country were available, studies that provided data for temporal trends in the aetiologies of cirrhosis were prioritized for selection. <sup>b</sup>Definition for MAFLD as described by Eslam et al.<sup>32</sup> HBV, hepatitis B virus; HCV, hepatitis C virus; NAFLD, non-alcoholic fatty liver disease; NASH, non-alcoholic steatohepatitis; MAFLD, metabolic associated fatty liver disease.

- 1 Flemming, J. A., Djerboua, M., Groome, P. A., Booth, C. M. & Terrault, N. A. NAFLD and Alcohol-Associated Liver Disease Will Be Responsible for Almost All New Diagnoses of Cirrhosis in Canada by 2040. *Hepatology* **74**, 3330-3344 (2021).
- 2 Orman, E. S. *et al.* Trends in Characteristics, Mortality, and Other Outcomes of Patients With Newly Diagnosed Cirrhosis. *JAMA network open* **2**, e196412 (2019).
- 3 Ioannou, G. N., Green, P., Lowy, E., Mun, E. J. & Berry, K. Differences in hepatocellular carcinoma risk, predictors and trends over time according to etiology of cirrhosis. *PLoS ONE [Electronic Resource]* **13**, e0204412 (2018).
- 4 Goldberg, D. *et al.* Changes in the Prevalence of Hepatitis C Virus Infection, Nonalcoholic Steatohepatitis, and Alcoholic Liver Disease Among Patients With Cirrhosis or Liver Failure on the Waitlist for Liver Transplantation. *Gastroenterology* **152**, 1090-1099.e1091 (2017).
- 5 El-Serag, H. B. *et al.* Risk Factors for Cirrhosis in Contemporary Hepatology Practices-Findings From the Texas Hepatocellular Carcinoma Consortium Cohort. *Gastroenterology* **159**, 376-377 (2020).
- 6 Gonzalez-Chagolla, A. *et al.* Cirrhosis etiology trends in developing countries: Transition from infectious to metabolic conditions. Report from a multicentric cohort in central Mexico. *The Lancet Regional Health – Americas* **7**, 100151 (2022).
- 7 Appel-da-Silva, M. C. *et al.* Incidence of hepatocellular carcinoma in outpatients with cirrhosis in Brazil: A 10-year retrospective cohort study. *World J. Gastroenterol.* **22**, 10219-10225 (2016).

- 8 West, J., Card, T. R., Aithal, G. P. & Fleming, K. M. Risk of hepatocellular carcinoma among individuals with different aetiologies of cirrhosis: a population-based cohort study. *Aliment. Pharmacol. Ther.* **45**, 983-990 (2017).
- 9 Ratib, S., Fleming, K. M., Crooks, C. J., Aithal, G. P. & West, J. 1 and 5 year survival estimates for people with cirrhosis of the liver in England, 1998-2009: a large population study. *J. Hepatol.* **60**, 282-289 (2014).
- 10 Gu, W. *et al.* Trends and the course of liver cirrhosis and its complications in Germany: Nationwide population-based study (2005 to 2018). *Lancet Reg Health Eur* **12**, 100240 (2022).
- 11 Javaud, N. *et al.* Prognosis of cirrhotic patients admitted to Emergency Departments: A multicenter study. *Am. J. Emerg. Med.* **37**, 1317-1321 (2019).
- 12 Hagström, H. *et al.* Etiologies and outcomes of cirrhosis in a large contemporary cohort. *Scand. J. Gastroenterol.* **56**, 727-732 (2021).
- 13 Olafsson, S. *et al.* A nationwide population-based prospective study of cirrhosis in Iceland. *JHEP Rep* **3**, 100282 (2021).
- 14 Popescu, I. *et al.* The Romanian National Program for Liver Transplantation - 852 Procedures in 815 Patients over 17 Years (2000-2017): A Continuous Evolution to Success. *Chirurgia (Bucur.)* **112**, 229-243 (2017).
- 15 Stroffolini, T. *et al.* Characteristics of liver cirrhosis in Italy: Evidence for a decreasing role of HCV aetiology. *Eur. J. Intern. Med.* **38**, 68-72 (2017).
- 16 Stroffolini, T. *et al.* Characteristics of liver cirrhosis in Italy: results from a multicenter national study. *Dig. Liver Dis.* **36**, 56-60 (2004).
- 17 Elzouki, A. N. *et al.* Predicting mortality of patients with cirrhosis admitted to medical intensive care unit: An experience of a single tertiary center. *Arab J. Gastroenterol.* **17**, 159-163 (2016).
- 18 Pourafkari, L. *et al.* Electrocardiographic findings in hepatic cirrhosis and their association with the severity of disease. *Cor Vasa* **59**, e105-e113 (2017).
- 19 Tailakh, M. A. *et al.* Liver Cirrhosis, Etiology and Clinical Characteristics Disparities Among Minority Population. *J Immigr Minor Health* **24**, 1122-1128 (2022).
- 20 Duah, A., Agyei-Nkansah, A., Osei-Poku, F., Duah, F. & Addo, B. P. Sociodemographic characteristics, complications requiring hospital admission and causes of in-hospital death in patients with liver cirrhosis admitted at a district hospital in Ghana. *PLoS One* **16**, e0253759 (2021).
- 21 Apica, B. S., Ocama, P., Seremba, E., Opio, K. C. & Kagimu, M. M. Decompensated cirrhosis-related admissions in a large urban hospital in Uganda: prevalence, clinical and laboratory features and implications for planning patient management. *Afr. Health Sci.* **13**, 927-932 (2013).
- 22 Mukherjee, P. S. *et al.* Etiology and mode of presentation of chronic liver diseases in India: A multi centric study. *PLoS One* **12**, e0187033 (2017).
- 23 Alvi, H., Zuberi, B. F., Rasheed, T. & Ibrahim, M. A. Evaluation of endoscopic variceal band ligation sessions in obliteration of esophageal varices. *Pak J Med Sci* **36**, 37-41 (2020).
- 24 Niriella, M. A. *et al.* Sero-prevalence and vaccination status of hepatitis A and hepatitis B among adults with cirrhosis in Sri Lanka: a hospital based cohort study. *BMC Res. Notes* **10**, 303 (2017).
- 25 Nawalerspanya, S., Sripongpun, P., Chamroonkul, N., Kongkamol, C. & Piratvisuth, T. Validation of original, expanded Baveno VI, and stepwise & platelet-MELD criteria to rule out varices needing treatment in compensated cirrhosis from various etiologies. *Ann. Hepatol.* **19**, 209-213 (2020).
- 26 Wendy Tan, A. Y. & Chieng, J. Y. Endoscopic variceal ligation as primary prophylaxis for oesophageal variceal bleeding at a Malaysian tertiary hospital. *Med. J. Malaysia* **73**, 361-364 (2018).

- 27 Tan, E. X.-X. *et al.* Impact of COVID-19 on Liver Transplantation in Hong Kong and Singapore: A Modelling Study. *The Lancet Regional Health – Western Pacific* **16**, 100262 (2021).
- 28 Bui Huu, H. *et al.* Characterization of SCCA-IgM as a biomarker of liver disease in an Asian cohort of patients. *Scand. J. Clin. Lab. Invest.* **78**, 204-210 (2018).
- 29 Xiong, J., Huang, J., Sun, W., Wang, J. & Chen, D. Non-alcoholic steatohepatitis-related liver cirrhosis is increasing in China: a ten-year retrospective study. *Clinics (Sao Paulo, Brazil)* **70**, 563-568.
- 30 Enomoto, H. *et al.* Transition in the etiology of liver cirrhosis in Japan: a nationwide survey. *J. Gastroenterol.* **55**, 353-362 (2020).
- 31 Jang, W. Y. *et al.* Changes in Characteristics of Patients with Liver Cirrhosis Visiting a Tertiary Hospital over 15 Years: a Retrospective Multi-Center Study in Korea. *J. Korean Med. Sci.* **35**, e233 (2020).
- 32 Eslam, M. *et al.* MAFLD: A Consensus-Driven Proposed Nomenclature for Metabolic Associated Fatty Liver Disease. *Gastroenterology* **158**, 1999-2014.e1991 (2020).
